# Supplementary material
Source: MDPI journal article supplement (https://www.mdpi.com/2073-4433/13/4/620)
Supplement: s1 [file s1]

## Supplementary Materials:

# Long-Term Dynamics and Response to Climate Change of Different Vegetation Types Using GIMMS NDVI3g Data over Amathole District in South Africa

Gbenga Abayomi Afuye <sup>1,2,\*</sup>, Ahmed Mukalazi Kalumba <sup>1,2</sup>, Kazeem Abiodun Ishola <sup>3</sup>  
and Israel Ropo Orimoloye <sup>4,5</sup>

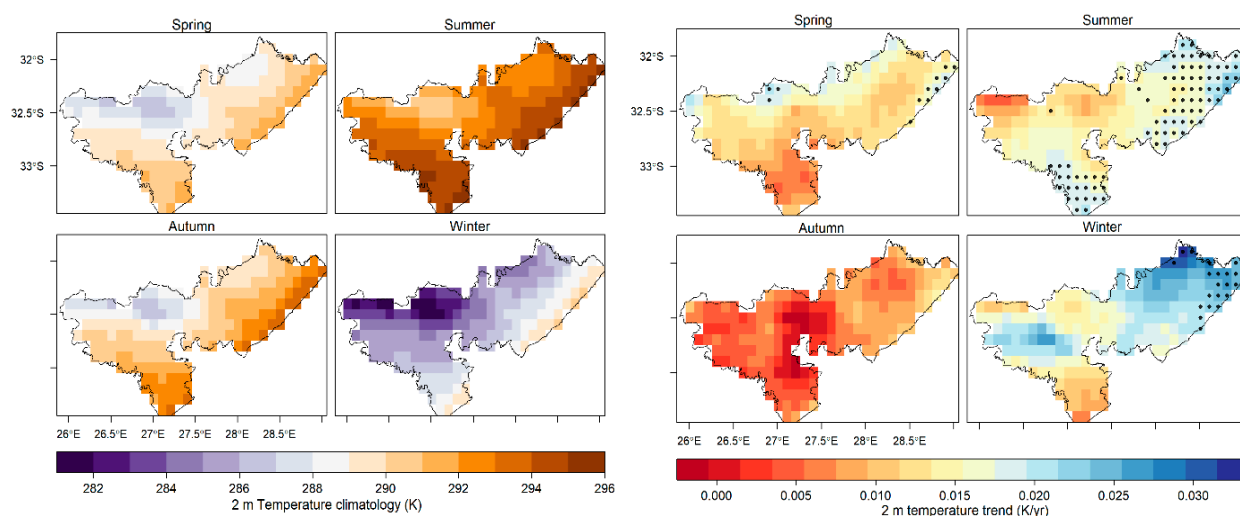

**Figure S1.** Spatial characteristics of seasonal ERA5-Land 2m temperature climatology (left) and trend (right) (1981-2015) for Amathole district. Stippling indicates pixels with statistical significance ( $p$ -value < 0.05).

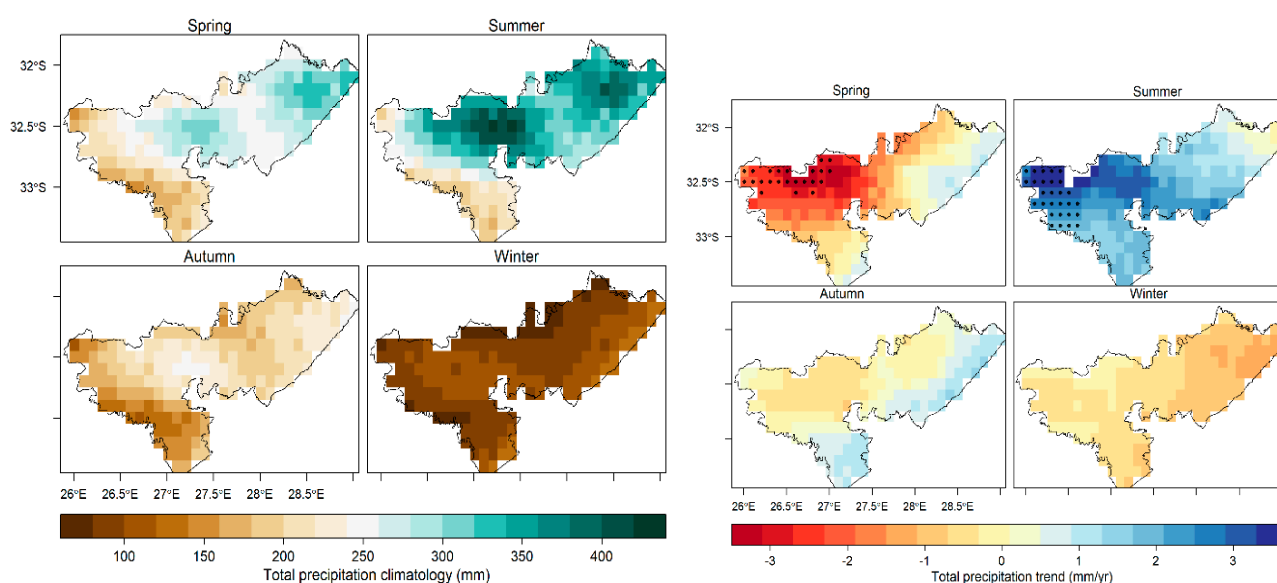

**Figure S2.** Spatial characteristics of seasonal ERA5-Land precipitation climatology (left) and trend (right) (1981-2015) for Amathole district. Stippling indicates pixels with statistical significance ( $p$ -value < 0.05).

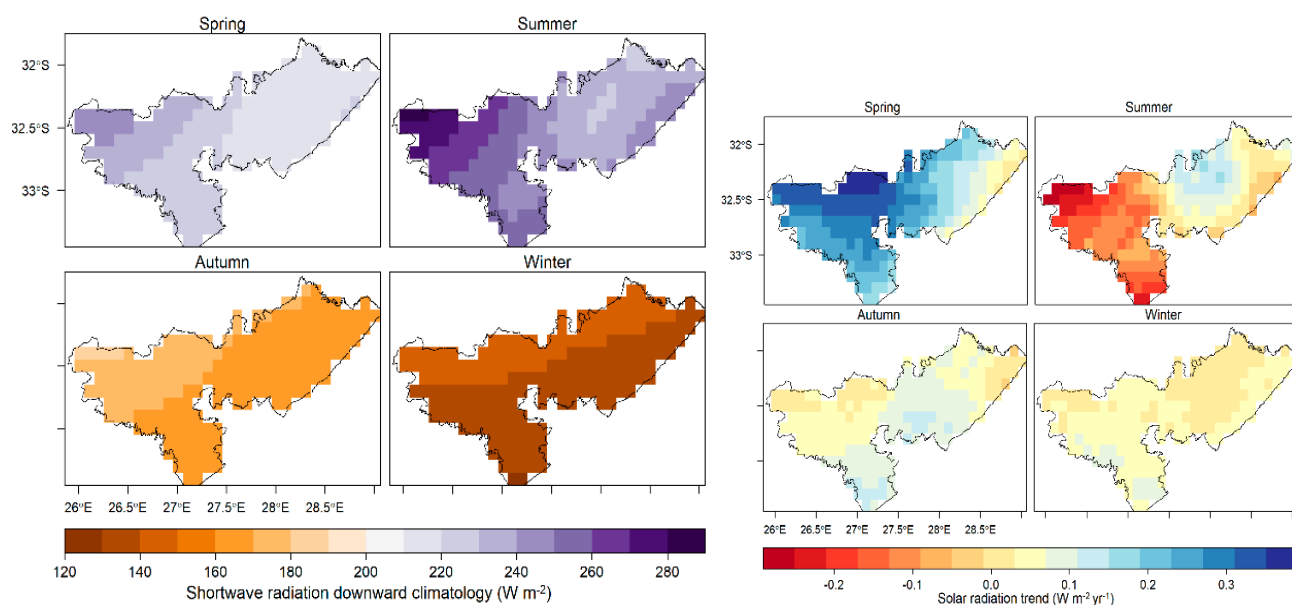

**Figure S3.** Spatial characteristics of seasonal ERA5-Land shortwave radiation downward climatology. (left) and trend (right) (1981-2015) for Amathole district. Stippling indicates pixels with statistical significance ( $p$ -value < 0.05).

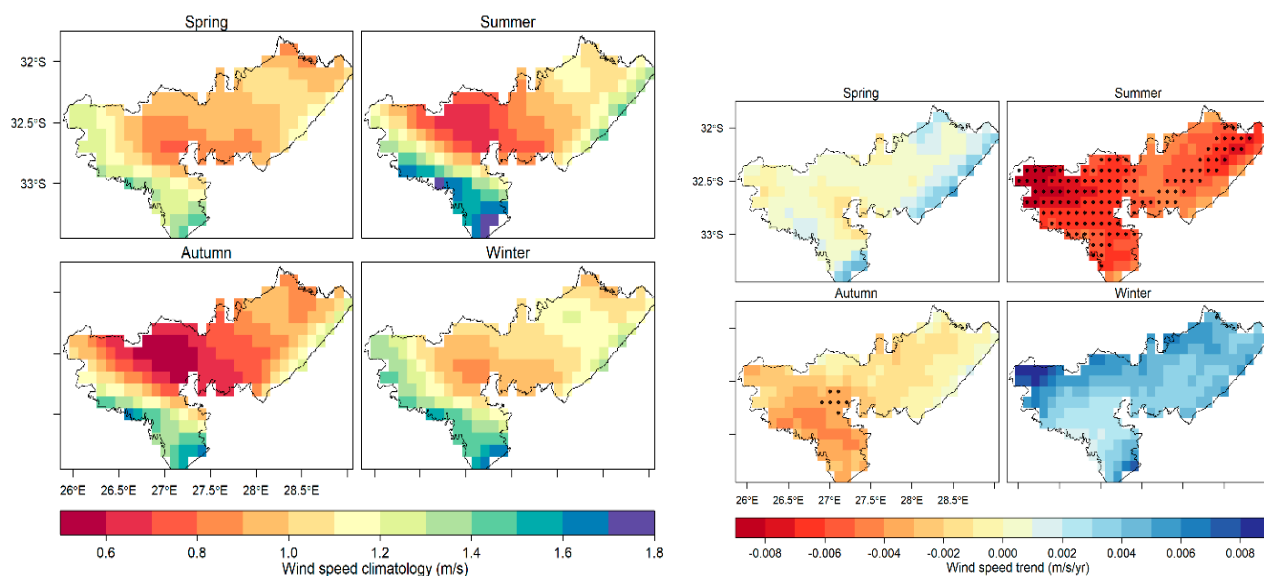

**Figure S4.** Spatial characteristics of seasonal ERA5-Land wind speed climatology (left) and trend. (right) (1981-2015) for Amathole district. Stippling indicates pixels with statistical significance ( $p$ -value < 0.05).

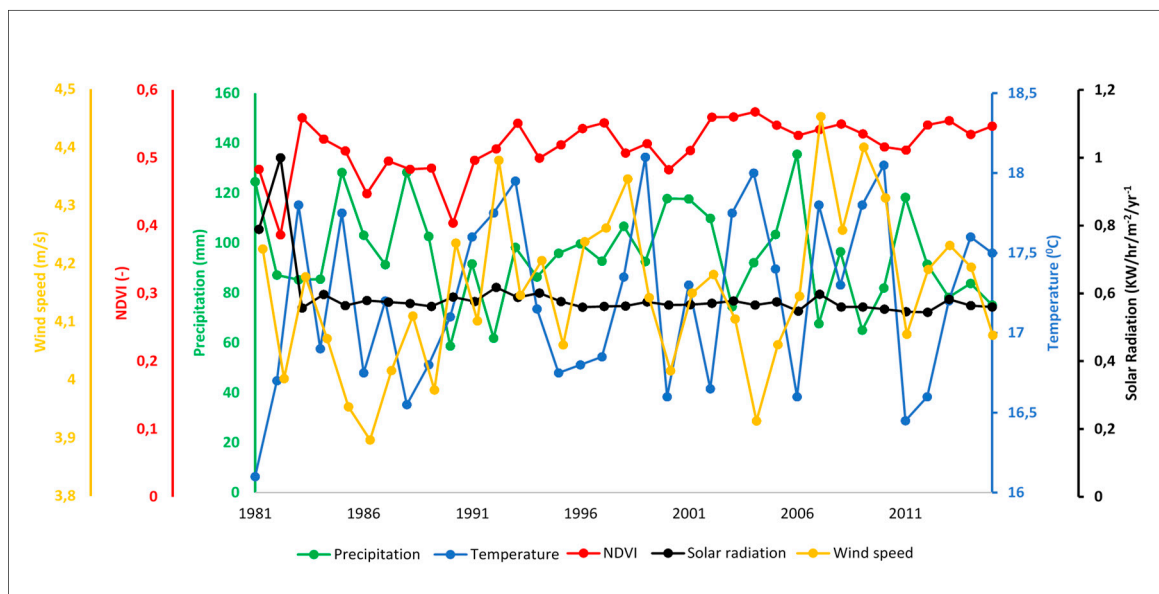

**Figure S5.** Time-series of NDVI3g and climate variables from 1981 to 2015 for ADM.
